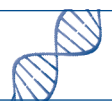

# Phylogeography of a mite, *Halozetes fulvus*, reflects the landscape history of a young volcanic island in the sub-Antarctic

ELIZABETH MORTIMER<sup>1†</sup>, BETTINE JANSEN VAN VUUREN<sup>1,2\*</sup>,  
K. IAN MEIKLEJOHN<sup>3</sup> and STEVEN L. CHOWN<sup>2</sup>

<sup>1</sup>Department of Botany and Zoology, Evolutionary Genomics Group, Stellenbosch University, Private Bag X1, Matieland 7602, South Africa

<sup>2</sup>Department of Botany and Zoology, Centre for Invasion Biology, Stellenbosch University, Private Bag X1, Matieland 7602, South Africa

<sup>3</sup>Department of Geography, Rhodes University, PO Box 94, Grahamstown, 6140, South Africa

Received 2 February 2011; revised 8 July 2011; accepted for publication 8 July 2011

Previous studies of the microarthropods of Marion Island, Southern Ocean, documented high mitochondrial COI (cytochrome *c* oxidase subunit I) haplotype diversity and significant genetic structure, which were ascribed to landscape subdivision. In this paper we revisit these ideas in light of new geomorphological evidence indicating a major lineament orientated along N26.5°E. Using the microarthropod *Halozetes fulvus*, we test the hypothesis that the eastern and western sides of the island show different population genetic patterns, corresponding to the previously unrecognized geological separation of these regions, and perhaps also with differences in climates across the island and further landscape complexity. Mitochondrial COI data were collected for 291 *H. fulvus* individuals from 30 localities across the island. Notwithstanding our sampling effort, haplotype diversity was under-sampled as indicated by rarefaction analyses. Overall, significant genetic structure was found across the island as indicated by  $\Phi_{ST}$  analyses. Nested clade phylogeographical analyses suggested that restricted gene flow (with isolation-by-distance) played a role in shaping current genetic patterns, as confirmed by Mantel tests. At the local scale, coalescent modelling revealed two different genetic patterns. The first, characterizing populations on the south-western corner of the island, was that of low effective population size and high gene flow. The converse was found on the eastern side of Marion Island. Taken together, substantial differences in spatial genetic structure characterize *H. fulvus* populations across Marion Island, in keeping with the hypothesis that the complex history of the island, including the N26.5°E geological lineament, has influenced population genetic structure. © 2011 The Linnean Society of London, *Biological Journal of the Linnean Society*, 2012, **105**, 131–145.

**ADDITIONAL KEYWORDS:** biogeography – COI – geomorphology – Marion Island – Prince Edward Islands – rarefaction analyses.

## INTRODUCTION

The complex biological and geological history of the southern hemisphere is emerging as a common biogeographical theme (see, for example, Bergstrom & Chown, 1999; Chown & Convey, 2007; Convey &

Stevens, 2007). Once thought to be a consequence mostly of vicariance, geographical distributions across the hemisphere have now been shown also to include signals of dispersal and local speciation and extinction events (e.g. Sanmartín & Ronquist, 2004; de Queiroz, 2005; Allegrucci *et al.*, 2006; Grobler *et al.*, 2006, 2011a; Stevens *et al.*, 2006; Sanmartín, Wannorp & Winkworth, 2007; McGaughan *et al.*, 2010a; Mortimer *et al.*, 2011). At smaller spatial scales, isolation-by-distance characterizes some

\*Corresponding author. E-mail: [bjvv@sun.ac.za](mailto:bjvv@sun.ac.za)

†Present address: Subunit Vaccine Group, Department of Molecular and Cell Biology, University of Cape Town, Rondebosch 7701, South Africa.

species, in others a clear record of vicariance associated with glaciation is present, whilst in a few cases, recent dispersal events have been proposed (Skotnicki, Ninham & Selkirk, 2000; Fanciulli *et al.*, 2001; Frati, Spinsanti & Dallai, 2001; Skotnicki *et al.*, 2001; Coulson *et al.*, 2002; Stevens & Hogg, 2003; Myburgh *et al.*, 2007; Rogers, 2007; Hawes *et al.*, 2008).

Whether these patterns are congruent amongst taxa is not yet clear, largely owing to the paucity of investigations. However, biogeographical complexity appears to be characteristic of at least some species on the sub-Antarctic islands and, in most cases, this complexity has been ascribed to the multifaceted histories of Southern Ocean islands including repeated episodes of volcanism and glaciation. For example, Myburgh *et al.* (2007; see also McGaughan *et al.*, 2010b) documented high mitochondrial COI (cytochrome *c* oxidase subunit I) haplotype diversity and significant genetic structure in two indigenous springtail species from Marion Island (these studies included 113 individuals of *Cryptopygus antarcticus travei* from ten localities and 40 individuals of *Tullbergia bisetosa* from ten localities), and suggested that this may be a consequence of landscape subdivision by volcanic and glacial events on the island. Similar findings of significant genetic structure across Marion Island were reported for the prostigmatid mite *Eupodes minutus* (57 individuals from 11 localities; Mortimer & Jansen van Vuuren, 2007), the cushion plant *Azorella selago* (Mortimer *et al.*, 2008), and for members of the *Ectemnorhinus* group of weevils (Grobler *et al.*, 2006, 2011a, b). These studies suggest that landscape evolution has substantially affected the phylogeography of species on the island in a way similar to landscape effects on species of other islands such as Rapa and the Hawaiian and Canary archipelagos (Paulay, 1985; Wagner & Funk, 1995; Gillespie, 2004; Emerson *et al.*, 2006). In the latter cases, volcanism and the pattern and timing of lava flows have largely been responsible for genetic structure and speciation in the taxa concerned. The ways in which population genetic structure may be affected by topography, distance, and the complexity of the environment are recognized as significant for understanding spatial patterns in diversity, as is now recognized generally within landscape genetics (e.g. Storfer *et al.*, 2010).

The reasons for such highly structured patterns in haplotype diversities on Marion Island remain unknown, as do the ways in which this structure may reflect the island's geological history. Although some relationship is evident between the geological age (c. 450 000 years) and evolution (i.e. the timing of volcanic and glacial events) of the island (see McDougall, Verwoerd & Chevallier, 2001) and popu-

lation differentiation and demographic expansions as determined using standard molecular clock approaches (Grobler *et al.*, 2006, 2011b; Mortimer & Jansen van Vuuren, 2007; Myburgh *et al.*, 2007), no previous geological interpretations (summarized in Hall, 2002) fully explain why substantially different population processes appear to characterize the eastern and western sides of the island (as described in Mortimer & Jansen van Vuuren, 2007; Myburgh *et al.*, 2007; McGaughan *et al.*, 2010b). Nyakatya & McGeoch (2008) also report that microclimate temperatures, when considered at different altitudes as well as on the eastern and western sides of Marion Island, vary significantly. However, the extent to which these temperature differences shape genetic patterns has not been fully investigated, although a single preliminary finding has provided weak support for the idea that life-history effects via variation in metabolic rate may be involved (McGaughan *et al.*, 2010b). In addition, the original investigations were characterized by relatively small sample sizes for each locality, and for each of the studies as a whole, precluding firm inferences.

Therefore, to provide further insight into the likelihood that complex landscape evolution on Marion Island is reflected in invertebrate phylogeography, we investigate an additional species endemic to the Prince Edward Islands (comprising Marion and Prince Edward Island, the latter which lies c. 22 km north-east of Marion Island), namely the oribatid mite *Halozetes fulvus*, using a much larger sample size [the largest number of individuals studied to date is 113 for the springtail species *Cryptopygus antarcticus travei* (McGaughan *et al.*, 2010b) compared with the 291 *H. fulvus* individuals included in the present study]. In essence, we test the hypothesis that the eastern and western sides of the island show very different phylogeographical patterns, resulting from a previously unrecognized geological feature of these regions, namely a major linear geological feature which links the western scarp of the Sfinks/Feldmark Plateau massif and the western scarp of Long Ridge (see below). We interpret data for *H. fulvus*, and previous phylogeographical information on mites and springtails, in the context of new findings concerning the geological evolution of the Marion Island landscape. Whilst we initially established phylogeographical hypotheses based on previous interpretations of the geology of the island (such as the geographical position of lava flows and glaciations), it quickly became apparent that this approach was simplistic because of the rapid development of new geological insights that might also be informed by phylogeographical work (Boelhouwers *et al.*, 2008; Hall, Meiklejohn & Bumby, 2011). Thus, we elect to pursue a strategy of reciprocal

clarification of phylogeographical and geological history (following Emerson *et al.*, 2006).

If the geological history of the island has an impact on invertebrate populations, and particularly the considerable variability in haplotype diversity and its spatial structuring, then one or more of three major patterns might be expected. First, genetic patterns that are largely driven by adaptive processes associated with temporal and geochemical differences in eruptive events that gave rise to the eastern and western successions of grey lava. However, geochemical differences between these lava flows are only slight (Kable, Erlank & Cherry, 1971). Second, spatial segregation among populations might be expected across the N26.5°E lineament that separates the eastern and western sections of the island (see Geology of Marion Island below), largely driven by the difficulty of routinely crossing this barrier. Finally, some structure might also be related to the fact that the island was extensively glaciated during the Last Glacial Maximum (LGM) (Hall, 2002; Boelhouwers *et al.*, 2008; Hall *et al.*, 2011), with some high grey lava areas

possibly serving as refugia, culminating in a patterns of higher genetic diversity in areas where refugia might have existed with connectedness among populations as individuals re-colonize available habitat.

MATERIAL AND METHODS

GEOLOGY OF MARION ISLAND

Marion Island is a young intra-plate shield volcano, with the oldest dated lavas being approximately 450 kya (McDougall *et al.*, 2001). The island comprises a basaltic geology from eight episodes of volcanic activity, the youngest (Holocene) lavas being less than 10 kya (McDougall *et al.*, 2001). The two eruptive centres, situated some 4 km apart in the centre of the island (Verwoerd, 1971; Chevallier, 1986; McDougall *et al.*, 2001), have given rise to distinctive grey lava successions, identified as ‘Eastern’ (found predominantly on the northern and eastern side of Marion Island) and ‘Western’ (found on the western side of Marion Island) (see Fig. 1) (Verwoerd, 1971;

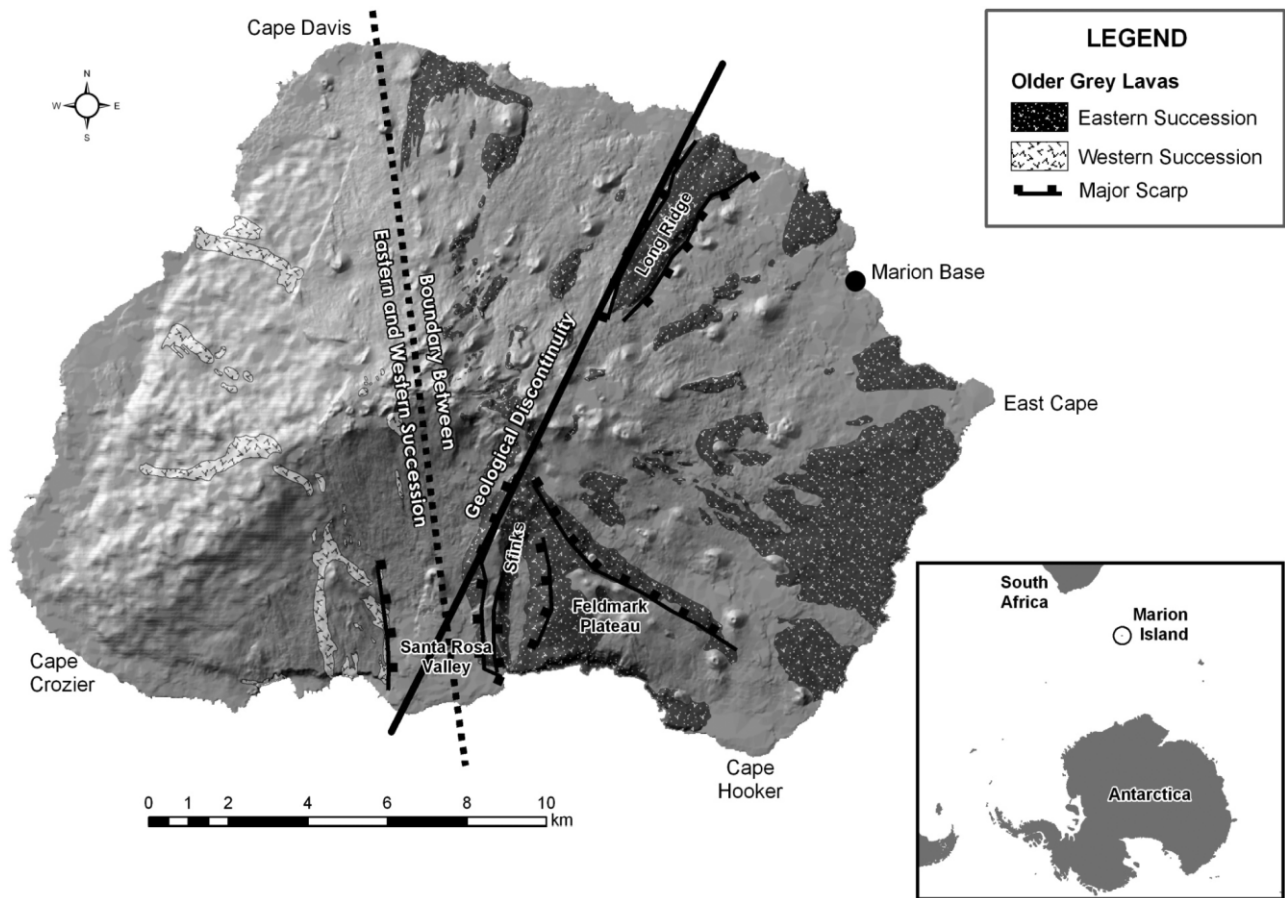

**Figure 1.** Schematic geological map of Marion Island overlain on a digital elevation model (from Meiklejohn & Smith, 2008), showing the N26.5°E geological discontinuity, and the boundary between eastern and western grey lava successions.



McDougall *et al.*, 2001). The surface topography of Marion Island is dominated by Holocene black lavas and scoria cones from the most recent volcanic episode.

Visually, the most prominent topographical features on Marion Island are the Santa Rosa Valley and two areas of higher relative relief, the Feldmark Plateau and Long Ridge (Fig. 1). Although the origins of these structures have been debated (see Verwoerd, 1971; Hall, 1982; Chevallier, 1986; McDougall *et al.*, 2001; Hall *et al.*, 2011), a requirement for their formation is the existence of a geological discontinuity that forms the boundary of the landform. To identify topographical lineaments (linear features that expresses an underlying geological structure, which are most often revealed by aerial photography, satellite imagery and hill-shaded digital elevation models), a 20-m-resolution shaded digital elevation model of Marion Island was built using the methods described in Meiklejohn & Smith (2008). It is clear that a major lineament links the western scarp of the Sfinks/Feldmark Plateau massif and the western scarp of Long Ridge, and which roughly corresponds to the eastern boundary of the volcanic rift zone identified by Chevallier (1986). The orientation of the lineament (N26.5°E) (Fig. 1) is close to the general structural trend of the island (N20°E, see Chevallier, 1986) and the general trend of the Prince Edward Fracture Zone, which marks the continental plate boundary.

#### SAMPLE COLLECTION AND LABORATORY PROTOCOLS

In total, 291 *Halozetes fulvus* individuals were collected from 30 localities across Marion Island during the 2004 and 2005 relief voyages (see Fig. 2; Table 1). They were sampled from plant material including mosses (*Ditrichum strictum*), tussock grass (*Poa cookii*), and other flowering plants (*Azorella selago*, *Cotula plumosa*, and *Crassula moschata*). Specimens were extracted by sieving and preserved in absolute ethanol. Because the west-central parts of the island are difficult to access and exceptionally rugged in places, and the central interior part is characterized by both surface and sub-surface ice, sampling was not undertaken here.

Total genomic DNA was extracted from individual mites using the QIAamp DNA micro kit (Qiagen, Hilden, Germany). For this study, the 5' side of the mitochondrial COI gene was targeted using the universal primers described by Folmer *et al.* (1994). Although several papers have questioned the neutrality of mitochondrial DNA (Ballard & Kreitman, 1995; Ballard & Whitlock, 2004), the COI gene has proven to be a useful marker to describe genetic variation in microarthropods (Emerson, Oromi & Hewitt, 2000; Salomone *et al.*, 2002; Stevens & Hogg, 2003; Mor-

timer & Jansen van Vuuren, 2007; Myburgh *et al.*, 2007). All the PCR reactions were performed using 10 ng of DNA under the following cycling parameters: 94 °C for 1 min, 35 cycles at 94 °C for 30 s, 50 °C for 30 s, and 72 °C for 45 s, and a final extension step at 72 °C for 5 min. PCR products were gel purified with the Wizard SV Gel and PCR clean-up system (Promega, Madison, WI, USA) and sequencing with the forward LCO1 primer (Folmer *et al.*, 1994) was performed with half-reactions (4 µL) of BigDye Terminator 3.1 mix (Applied Biosystems, Warrington, UK). Purified sequencing products were run on an ABI 3100 automated sequencer (Applied Biosystems). All sequences with ambiguous nucleotides were re-sequenced with the reverse HCO1 primer (Folmer *et al.*, 1994). In addition, 20% of all individuals were sequenced twice to verify the accuracy of the results. All the unique *H. fulvus* haplotypes generated in this study were deposited in GenBank (DQ883230–DQ883330).

#### SEQUENCE ANALYSIS

DNA sequences were aligned by eye and haplotypes were identified using Collapse 1.2 (Posada, 2004). In keeping with the suggestion of Lowe, Harris & Ashton (2004: 66) that rarefaction techniques can be used to estimate haplotype diversity, ecological methods were also used to estimate the extent to which the majority of haplotypes had been sampled and how many haplotypes might exist in the population. Specifically, the non-parametric Chao 2 and Jackknife 2 estimators were calculated and an individual-based rarefaction curve (see Gotelli & Colwell, 2001; Magurran, 2004) was constructed for *H. fulvus* using the EstimateS vs. 7.51 software (Colwell, 2005). These methods have traditionally been applied either for estimating the likely total species richness of a given habitat based on sampling data, or for comparing richness values among habitats or sampling periods for a given number of samples or individuals (Magurran, 2004). From the species richness perspective, the theory underlying and performance of these methods is being increasingly well explored (e.g. Brose, Martinez & Williams, 2003; Brose & Martinez, 2004; Chao *et al.*, 2005; O'Hara, 2005; Ulrich & Ollik, 2005; Walther & Moore, 2005). However, these methods are not commonly applied to haplotype data (but see Myburgh *et al.*, 2007). Individual-based rarefaction curves were used because our sampling unit was individuals (Gotelli & Colwell, 2001), and the Chao 2 and Jackknife 2 estimators were adopted because they are generally most robust (Brose *et al.*, 2003; Walther & Moore, 2005). Fifty randomizations (sampling without replacement) and 1000 randomizations (sampling with replacement) were performed to verify the results.

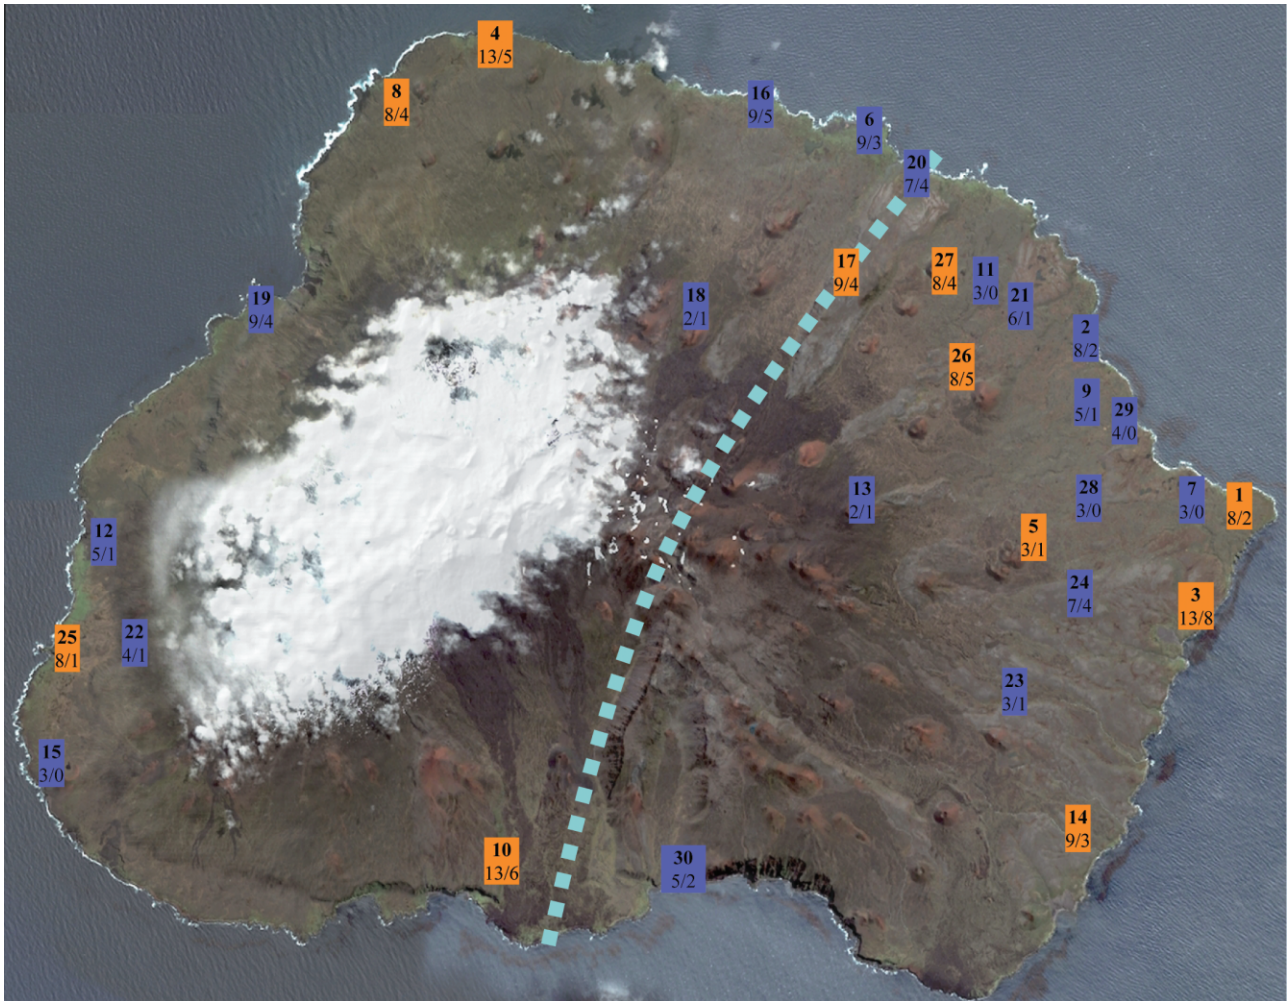

**Figure 2.** Map of Marion Island indicating the sampling localities (in darker grey squares). Population numbers correspond to those given in Table 1. The total number of haplotypes per locality as well as the number of singletons (total/singletons) is shown. Localities in paler grey indicate those where divergent haplotypes were found, and correspond well with suggested ice-free areas during the Last Glacial Maximum (see Hall *et al.*, 2011).

Uncorrected sequence divergences among sampling localities were calculated in DnaSP 5.1 (Librado & Rozas, 2009). Traditional  $\phi$  ( $\Phi$ )-statistics as well as pair-wise differences ( $\Phi_{ST}$ ) among populations were calculated in Arlequin 3.1 (Excoffier, Laval & Schneider, 2005) with null distributions obtained via permutational procedures (1000 randomizations). To depict the evolutionary relationship among haplotypes a statistical parsimony network was constructed using TCS 1.2 (Clement, Posada & Crandall, 2000) (for network choice see Joly, Stevens & Jansen van Vuuren, 2007). Ambiguities in the network were resolved following the criteria outlined in Crandall & Templeton (1993) and Pfenninger & Posada (2002). In short, we assumed that tip haplotypes are more likely to connect to interior haplotypes or haplotypes with higher frequency than to other tip haplotypes, and

that haplotypes were more likely to connect to haplotypes in the same geographical vicinity. The network was converted into a set of nested clades following Templeton, Boerwinkle & Sing (1987). Nested clade phylogeographical analyses (NCPAs) were performed in Geodis 2.5 (Posada, Crandall & Templeton, 2000) and results were interpreted using the most recent inference key (<http://darwin.uvigo.es/software/geodis.html>). Although NCPA has been criticized (see, for example, Panchal & Beaumont, 2007; Petit, 2008; for a response see Templeton 2008) it remains one of the few methods available that statistically infer phylogeographical patterns across species distributions. The most common false positive that is returned is 'isolation-by-distance with restricted gene flow'. Thus, to assess the likelihood of a true positive result of this kind, Mantel tests were also performed

**Table 1.** Summary statistics (haplotype and nucleotide diversity, mean  $\pm$  SD) for all sampling localities included in the present study

| Number | Sampling locality                              | Haplotype diversity | Nucleotide diversity | Haplotypes                                                                  |
|--------|------------------------------------------------|---------------------|----------------------|-----------------------------------------------------------------------------|
| 1      | Archway Bay<br>( <i>N</i> = 10)                | 0.955 $\pm$ 0.059   | 0.010 $\pm$ 0.006    | HF18, HF21, HF37, HF41, HF42, HF55, HF66, HF80                              |
| 2      | Base<br>( <i>N</i> = 10)                       | 0.955 $\pm$ 0.059   | 0.008 $\pm$ 0.005    | 13/HF1, HF5, HF11, HF12, HF23, HF37, HF54, HF55                             |
| 3      | Bullard Beach<br>( <i>N</i> = 19)              | 0.941 $\pm$ 0.037   | 0.010 $\pm$ 0.006    | HF5, HF13, HF14, HF22, HF51, HF55, HF68, HF69, HF89, HF90, HF91, HF93, HF98 |
| 4      | Cape Davis<br>( <i>N</i> = 19)                 | 0.929 $\pm$ 0.046   | 0.008 $\pm$ 0.004    | HF5, HF9, HF18, HF33, HF37, HF39, HF46, HF55, HF82, HF91, HF92, HF95, HF99  |
| 5      | Fred's Hill<br>( <i>N</i> = 4)                 | 0.833 $\pm$ 0.222   | 0.014 $\pm$ 0.010    | HF55, HF83, HF95                                                            |
| 6      | Goney Plain<br>( <i>N</i> = 10)                | 0.977 $\pm$ 0.054   | 0.005 $\pm$ 0.003    | HF1, HF3, HF5, HF9, HF37, HF53, HF57, HF78, HF84                            |
| 7      | Albatross Lakes<br>( <i>N</i> = 3)             | 1.000 $\pm$ 0.272   | 0.006 $\pm$ 0.005    | HF37, HF55, HF65                                                            |
| 8      | Devil's Footprint<br>( <i>N</i> = 10)          | 0.955 $\pm$ 0.059   | 0.010 $\pm$ 0.006    | HF5, HF6, HF15, HF19, HF28, HF62, HF66, HF72                                |
| 9      | Nellie Humps<br>( <i>N</i> = 10)               | 0.800 $\pm$ 0.100   | 0.010 $\pm$ 0.006    | HF37, HF55, HF58, HF95, HF97                                                |
| 10     | Greyheaded Albatross Ridge<br>( <i>N</i> = 19) | 0.929 $\pm$ 0.046   | 0.009 $\pm$ 0.005    | HF5, HF16, HF18, HF37, HF49, HF50, HF55, HF63, HF65, HF68, HF70, HF74, HF76 |
| 11     | Hoppie's Hell<br>( <i>N</i> = 5)               | 0.700 $\pm$ 0.2184  | 0.002 $\pm$ 0.002    | HF1, HF5, HF37                                                              |
| 12     | Kaalkoppie<br>( <i>N</i> = 11)                 | 0.763 $\pm$ 0.106   | 0.002 $\pm$ 0.001    | HF5, HF18, HF25, HF37, HF80                                                 |
| 13     | Katedraalkrans<br>( <i>N</i> = 2)              | 1.000 $\pm$ 0.500   | 0.004 $\pm$ 0.005    | HF5, HF40                                                                   |
| 14     | Kildalkey Bay<br>( <i>N</i> = 22)              | 0.813 $\pm$ 0.059   | 0.008 $\pm$ 0.004    | HF5, HF8, HF9, HF17, HF35, HF37, HF55, HF95, HF96                           |
| 15     | La Grange Kop<br>( <i>N</i> = 6)               | 0.733 $\pm$ 0.155   | 0.003 $\pm$ 0.003    | HF5, HF37, HF55                                                             |
| 16     | Log Beach<br>( <i>N</i> = 10)                  | 0.977 $\pm$ 0.054   | 0.006 $\pm$ 0.004    | HF4, HF5, HF9, HF18, HF27, HF30, HF31, HF55, HF88                           |
| 17     | Long Ridge<br>( <i>N</i> = 16)                 | 0.850 $\pm$ 0.077   | 0.006 $\pm$ 0.004    | HF5, HF26, HF37, HF38, HF43, HF64, HF85, HF87, HF99                         |
| 18     | Middelman<br>( <i>N</i> = 3)                   | 0.666 $\pm$ 0.314   | 0.001 $\pm$ 0.001    | HF55, HF61                                                                  |
| 19     | Mixed Pickle Cove<br>( <i>N</i> = 12)          | 0.909 $\pm$ 0.079   | 0.006 $\pm$ 0.004    | HF3, HF7, HF18, HF37, HF52, HF55, HF56, HF65, HF77                          |
| 20     | Ships Cove<br>( <i>N</i> = 10)                 | 0.911 $\pm$ 0.077   | 0.006 $\pm$ 0.004    | HF18, HF20, HF34, HF37, HF65, HF71, HF79                                    |
| 21     | Skua Ridge<br>( <i>N</i> = 10)                 | 0.777 $\pm$ 0.137   | 0.004 $\pm$ 0.003    | HF18, HF35, HF37, HF55, HF59, HF85                                          |
| 22     | Skuinskop<br>( <i>N</i> = 6)                   | 0.800 $\pm$ 0.172   | 0.006 $\pm$ 0.004    | HF5, HF32, HF37, HF55                                                       |
| 23     | Soft Plume River<br>( <i>N</i> = 3)            | 1.000 $\pm$ 0.272   | 0.004 $\pm$ 0.003    | HF9, HF18, HF86                                                             |
| 24     | Stoney Ridge<br>( <i>N</i> = 8)                | 0.964 $\pm$ 0.077   | 0.007 $\pm$ 0.005    | HF2, HF5, HF7, HF36, HF44, HF55, HF67                                       |
| 25     | Swartkops Point<br>( <i>N</i> = 10)            | 0.955 $\pm$ 0.059   | 0.006 $\pm$ 0.004    | HF5, HF9, HF18, HF37, HF45, HF55, HF80, HF101                               |
| 26     | Tafelberg<br>( <i>N</i> = 10)                  | 0.933 $\pm$ 0.077   | 0.007 $\pm$ 0.004    | HF9, HF10, HF29, HF37, HF55, HF75, HF81, HF100                              |
| 27     | Third Sister<br>( <i>N</i> = 12)               | 0.848 $\pm$ 0.103   | 0.007 $\pm$ 0.004    | HF5, HF37, HF47, HF48, HF73, HF85, HF94, HF95                               |
| 28     | Tom, Dick & Harry<br>( <i>N</i> = 4)           | 0.833 $\pm$ 0.222   | 0.005 $\pm$ 0.004    | HF37, HF55, HF58                                                            |
| 29     | Trypot Beach<br>( <i>N</i> = 9)                | 0.583 $\pm$ 0.183   | 0.004 $\pm$ 0.003    | HF5, HF37, HF55, HF89                                                       |
| 30     | Watertunnel<br>( <i>N</i> = 8)                 | 0.857 $\pm$ 0.108   | 0.006 $\pm$ 0.004    | HF5, HF24, HF45, HF55, HF60                                                 |

The population number corresponds to numbers used in Table 2 and Figure 1. The number of specimens included per locality is indicated in parentheses. The haplotypes identified at each locality is shown.



in Arlequin 3.1 (Excoffier *et al.*, 2005). The western side of Marion Island is relatively inaccessible and, as such, this side of the island was less sampled than the eastern side (see Fig. 2). Mantel tests were performed on all sampling localities situated on the southern and western side of the island (Watertunnel, locality 30; Greyheaded Albatross Ridge, locality 10; La Grange Kop, locality 15; Skuinskop, locality 22; Swartkops Point, locality 25; Kaalkoppie, locality 12 and Mixed Pickle Cove, locality 19). To minimize the sampling bias towards the eastern side of the island, Mantel tests were conducted on randomly selected localities on the eastern side of the island (in each case, 12 localities were randomly selected).

A coalescent-based approach (MDIV; Nielsen & Wakeley, 2001; Nielsen, 2002) was used to calculate theta ( $\theta$ ; an indicator of population size), gene flow ( $M$ ), and divergence time ( $T$ ). As several populations (sampling localities) have not diverged (see Results), we adopted this method as opposed to others such as LAMARC (Kuhner, 2006) which assumes that all populations have fully diverged. In these calculations, a mutation rate of 1.9% per million years (following species-specific rates reported in Mortimer *et al.*, 2011) and a generation time of 1 year were assumed. These analyses were limited to the four most divergent populations on Marion Island based on population pair-wise  $\Phi_{ST}$  comparisons (Kaalkoppie, population 12; Bullard Beach, population 3; Grey-headed Albatross Ridge, population 10; Long Ridge, population 17; Fig. 2). These four most divergent populations were then analysed with their neighbouring populations in a pair-wise manner with a total of 21 populations included in these comparisons, resulting in local population level as well as analyses at the regional (western, eastern, southern and northern) scale. The populations omitted from these analyses were characterized by small sample sizes (fewer than five individuals per population for populations 5, 7, 13, 18, 23, and 28) or because they were in close (< 1 km) proximity to populations included (8, 9, and 29). Overall, the populations included in the coalescent modelling provide a good coverage of the island. Upper credibility estimates for the migration parameter could not be calculated as runs did not form an asymptote and converge back to zero irrespective of the number of generations allowed for calculations. Multiple independent runs with different random seed numbers were conducted to verify the results. Simulations were run for 20 million generations with  $M_{max}$  set at 200 (this high value was specified in an attempt to reach an asymptote) while  $T_{max}$  was set at 10. In each case,  $M_{max}$  and  $T_{max}$  denote the prior distribution for the Bayesian analyses. The analyses were conducted under the HKY finite sites model (Hasegawa, Kishino & Yano, 1985) as suggested for

sequence data. The parameter values estimated with MDIV were compared with those estimated using the Isolation with Migration software (IM; Hey & Nielsen, 2004). IM was run for 100 million generations with a burn-in of 100 000.

## RESULTS

We sequenced 545 bp, which translated into 181 functional amino acids. A total of 101 haplotypes were identified, of which 73 were singletons ( $h = 0.92 \pm 0.01$ ). Haplotype and nucleotide diversities for all sampling localities are presented in Table 1 and the haplotypes recorded for each of the localities are presented in Supplementary Information Table S1. With the exceptions of Trypot Beach (locality 29) and Middelman (locality 18), haplotype diversities were high ( $\geq 0.7$ ) reflecting the large number of private haplotypes found in the study. Nucleotide diversities for sampling localities were generally low ( $\leq 0.01$ ) with the exceptions of Bullard Beach (locality 3) and Fred's Hill (locality 5). Taken together, this pattern might be interpreted as supporting population expansions. Rarefaction curves suggested that many haplotypes remained to be sampled (Fig. 3), with the Chao 2 estimator suggesting that a total of 290 (standard deviation of 77) haplotypes are likely to be present on the island.

The three most common haplotypes (HF37 comprising 21%, HF55 comprising 14%, and HF5 comprising 11% of the specimens) lie centrally on the haplotype network and are each connected to several haplotypes in a star-like pattern (see Fig. 4). Most haplotypes are connected by single mutational steps with only a few

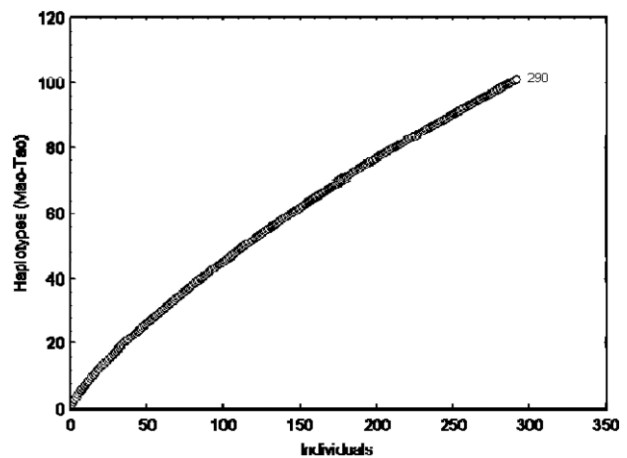

**Figure 3.** An individual-based rarefaction curve illustrating the increase in the number of haplotypes with increasing numbers of individuals. The number next to the curve (290) indicates the total estimated number of haplotypes using the non-parametric Chao2 estimator.

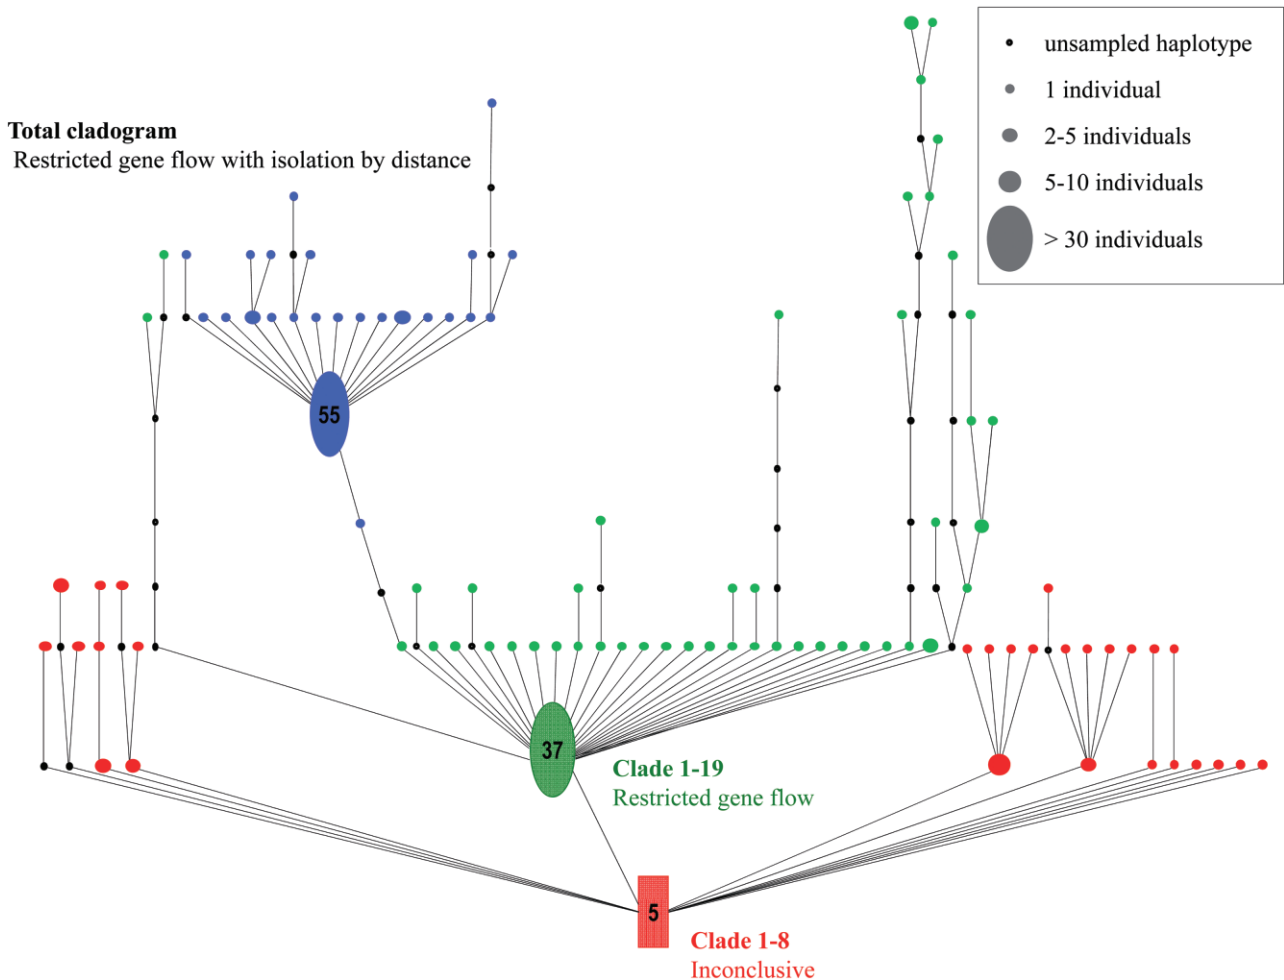

**Figure 4.** A haplotype network constructed using TCS. The three haplogroups are indicated in blue, green and red, and correspond to the three most common haplotypes (HF37, HF55 and HF5). Three clades (1-8, 1-19 and the entire cladogram) showed a significant correlation between geography and genetic diversity (as revealed by NCPA) and the outcomes are shown.

outliers being separated by more (up to ten) mutational changes, a pattern which is typical of recent population expansion, as also suggested by haplotype and nucleotide diversity values. Thirteen loops in the network were found, all of which could be resolved by applying the criteria of Crandall & Templeton (1993) and Pfenninger & Posada (2002). Two one-step clades as well as the entire cladogram showed a significant correlation between genetic and geographical distances (see Fig. 4). Overall, the inferred population history underlying the genetic structure of *H. fulvus* suggests that restricted gene flow (with isolation-by-distance) has played a role in shaping current genetic patterns (NCPA outcome for the entire cladogram). The outcome of the NCPA for clade 1-8 was inconclusive (tip interior status could not be determined). For clade 1-19, which includes haplotypes from localities

across the island, NCPA indicated restricted gene flow.

When conducting a Mantel test on all the western and southern localities included in this study (Water-tunnel, locality 30; Greyheaded Albatross Ridge, locality 10; La Grange Kop, locality 15; Skuinskop, locality 22; Swartkops Point, locality 25; Kaalkoppie, locality 12; Mixed Pickle Cove, locality 19), no isolation-by-distance was detected ( $P = 0.21$ ,  $r = 0.20$ ). To minimize the sampling bias towards the eastern side of the island, Mantel tests were conducted on randomly selected localities (in each case, 12 localities were randomly selected). In all cases, isolation-by-distance characterized localities on the eastern side of the island ( $P < 0.05$ ).

AMOVA, including all localities, indicated significant structuring of genetic variation ( $\Phi_{ST} = 0.07$ ,



**Table 2.** Coalescent results estimated for selected populations using MDIV (see text)

|                                      | $\theta$       | $M$             | $T$ (years BP) |
|--------------------------------------|----------------|-----------------|----------------|
| (A) Kaalkoppie (pop. 12)             |                |                 |                |
| Swartkops Point (pop. 25)            | 2.4 (1.3–5.9)  | 9.2 (2 – >*)    | 0              |
| La Grange Kop (pop. 15)              | 1.2 (0.5–3.8)  | 17.6 (1.2 – >*) | 0              |
| Skuinskop (pop. 22)                  | 1.4 (0.6–5.9)  | 1.2 (1.2 – >*)  | 0              |
| Greyheaded Albatross Ridge (pop. 10) | 4.1 (1.9–8.3)  | 1.6 (1.2 – >*)  | 0              |
| Mixed Pickle Cove (pop. 19)          | 2.6 (1.4–6.1)  | > 40 (1.6 – >*) | 0              |
| Cape Davis (pop. 4)                  | 4.8 (2.8–9.3)  | 16.8 (2.4 – >*) | 0              |
| (B) Bullard Beach (pop. 3)           |                |                 |                |
| Archway Bay (pop. 1)                 | 7.6 (4.8–14.4) | 2.1 (1 – >*)    | ~ 113 000      |
| Kildalkey Bay (pop. 14)              | 5.4 (3.4–9.6)  | 1.9 (0.8 – >*)  | ~ 90 000       |
| Stoney Ridge (pop. 24)               | 7.8 (4.9–14.7) | 3.2 (0.6 – >*)  | ~ 147 000      |
| Watertunnel (pop. 30)                | 5.6 (2.7–11.4) | 3.1 (0.5 – >*)  | ~ 34 000       |
| Base (pop. 2)                        | 6.4 (4.0–12.4) | 2.7 (0.6 – >*)  | ~ 79 000       |
| (C) Greyheaded (pop. 10)             |                |                 |                |
| Watertunnel (pop. 30)                | 4.7 (2.8–9.6)  | > 40 (5.6 – >*) | 0              |
| La Grange Kop (pop. 15)              | 3.8 (2.3–8.3)  | > 40 (5.2 – >*) | 0              |
| Skuinskop (pop. 22)                  | 4.4 (2.5–8.9)  | > 40 (7.2 – >*) | 0              |
| Kaalkoppie (pop. 12)                 | 4.1 (1.9–8.3)  | 1.6 (1.2 – >*)  | 0              |
| (D) Long Ridge (pop. 17)             |                |                 |                |
| Long Beach (pop. 16)                 | 5.6 (3.3–11.4) | 1.6 (1.4 – >*)  | ~ 56 000       |
| Goney Plain (pop. 6)                 | 5.3 (3.1–10.7) | 2.6 (1.2 – >*)  | ~ 56 000       |
| Hoppie’s Hell (pop. 11)              | 3.8 (2.0–8.0)  | 16.4 (4.8 – >*) | 0              |
| Third Sister (pop. 27)               | 5.0 (3.2–10.3) | > 40 (6.4 – >*) | 0              |
| Tafelberg (pop. 26)                  | 4.6 (2.7–9.5)  | 22.2 (5.8 – >*) | 0              |
| Ships Cove (pop. 20)                 | 4.9 (2.8–10.1) | 2.4 (1.8 – >*)  | 0              |
| Skua Ridge (pop. 21)                 | 4.1 (2.3–8.3)  | 15.6 (5 – >*)   | 0              |
| Base (pop. 2)                        | 5.4 (3.1–10.5) | 2.6 (1.4 – >*)  | ~ 56 000       |

The estimates of  $\theta$  (an indicator of population size), scaled migration rates ( $M$ ) and divergence time ( $T$ , given in years before present) are shown. The 95% credibility intervals are given in parentheses. \*The upper credibility interval could not be estimated as the parameter did not converge back to zero.

$P < 0.001$ ; d.f. = 29; sum of squares = 95.14; variance component = 0.144) thereby complementing our NCPA results. Population pair-wise  $\Phi_{ST}$  values indicated that five localities are significantly differentiated to more than 12 other localities (i.e. > 40% of the localities) (see Supplementary Information Table S2). These are Greyheaded Albatross Ridge (locality 10), Long Ridge (locality 17), Bullard Beach (locality 3), Middelman (locality 18), and Kaalkoppie (locality 12). Only three specimens were available for Middelman (locality 18) which does not allow meaningful statistical comparisons and this locality is therefore not included in subsequent locality-specific analyses. The remainder of the localities were not significantly differentiated from more than eight other localities (i.e. 25% of the localities).

IM and MDIV returned very similar results (for ease of representation we provide only the MDIV results). Both of these coalescent analyses indicated two different patterns across Marion Island (see

Table 2). The first characterized populations on the south-western corner of the island. Pair-wise comparisons between Kaalkoppie (locality 12) with neighbouring localities indicated low effective population sizes ( $\theta$ : range 1.4–4.8) and high (scaled) migration ( $M$ : range 1.2–45.6). As a result of the high migration, populations had not diverged ( $T = 0$ ). The second pattern was observed for populations centred on Bullard Beach (locality 3), a locality on the eastern side of Marion Island. Here, estimates of population size were typically high ( $\theta$ : range 5.4–7.9) while (scaled) migration rates were low ( $M$ : range 1.9–3.2). As a result, all populations had fully diverged from one another. Populations in the vicinity of Greyheaded Albatross Ridge (locality 10) and Long Ridge (locality 17), which also represented focal localities in the coalescent analyses, were largely characterized by the first pattern although some comparisons involving Long Ridge were more typical of the second pattern. Importantly, standard errors

around estimates are large, as is often typical for coalescent analyses, and divergence dates and migration estimates (given in Table 2) should not be seen as absolute, but rather as relative values where divergence times for populations on the eastern side of the island far exceed those for populations on the south-western side and where migration on the south-western side exceeds those on the eastern side of Marion Island.

Uncorrected sequence divergence values separating localities are presented in Supplementary Information Table S2. The average sequence divergence separating populations on the eastern side of Marion Island was 0.78%, that separating populations on the northern side of the island was 0.80%, while uncorrected divergence values separating populations on the south-western side of the island were notably lower and averaged 0.51% (only two populations are situated on the southern side of the island, and are therefore not included here). These results are congruent with the coalescent analyses, which suggest that populations on the south-western side of Marion Island are not as diverged as those found on the eastern and northern side of Marion Island.

## DISCUSSION

Despite considerably greater sampling intensity than for any previous estimates of mitochondrial COI haplotype diversity within invertebrate species (notably springtails, mites, and weevils) on Marion Island (291 individuals vs. a maximum of 113 previously – see McGaughran *et al.*, 2010b), haplotype diversity in *H. fulvus* showed no signs of asymptoting as a consequence of the considerable numbers of singletons. In consequence, it is unsurprising that the Chao2 estimator suggested a conservative value of at least another 180 haplotypes that remain to be discovered. Some of these undiscovered haplotypes (~20%) are accounted for in our haplotype network and their placement in the phylogeny is therefore known. Although some of these unsampled haplotypes may be extinct, and taken into account the error (standard deviation) associated with the estimate, it remains clear that haplotype diversity is notably high. Even this conservative estimate might be an underestimate as *H. fulvus* can reach densities of *c.* 700 individuals per m<sup>2</sup> in the cushion plant *Azorella selago* and in the epilithic biotope (Barendse & Chown, 2001). High haplotype diversity has similarly been recorded for other indigenous invertebrate species on the island, including a prostigmatid mite, two species of springtails, and three species of weevils (Grobler *et al.*, 2006, 2011a, b; Mortimer & Jansen van Vuuren, 2007; Myburgh *et al.*, 2007; McGaughran *et al.*, 2010b). By contrast, springtail species in Antarctica show some-

what lower levels of haplotype diversity (see Frati *et al.*, 2001; Stevens & Hogg, 2003; Nolan *et al.*, 2006; but see McGaughran *et al.*, 2010a) as do other arthropod species, such as on the Canary islands (Emerson *et al.*, 2000, 2006) and Hawaiian islands (Jordan *et al.*, 2005). The higher haplotype diversity found for invertebrate taxa on Marion Island compared with taxa occurring on Antarctica is further supported through rarefaction analyses which project a total of 28 haplotypes for the springtail species *Desoria klovstadi* and *Gomphiocephalus hodgsoni* (data for rarefaction analyses taken from Frati *et al.*, 2001; Stevens & Hogg, 2003; Nolan *et al.*, 2006) on Antarctica compared with 135 and 290 expected haplotypes for the springtail species *Cryptopygus antarcticus travei* and *H. fulvus*, respectively, on Marion Island (see Myburgh *et al.*, 2007 for rarefaction analyses). Invasive invertebrate species on Marion Island are typically characterized by only a single haplotype (Lee *et al.*, 2007, 2009; Myburgh *et al.*, 2007).

Why such high haplotype diversity might characterize the indigenous arthropod faunas of the island is not yet clear. However, virtually all of the shapes of the haplotype networks constructed to date (star-like patterns), including this one, suggest demographic changes. This may well have been a consequence of the fact that during the LGM, Marion Island was almost entirely glaciated with the exception of a few areas mostly along the coast but also at high elevation (Hall *et al.*, 2011). The presence of these proposed glacial-free areas is evidenced by glacial reconstructions based on extensive examination of glacio-depositional and erosional features across the island in combination with K–Ar dating of these (Hall, 2002; Hall *et al.*, 2011, see also fig. 4.3 in Boelhouwers *et al.*, 2008). For the springtails *Cryptopygus antarcticus travei* and *Tullbergia bisetosa*, it seems likely that refugia included high elevation ‘nunataks’ such as the grey lava ridge Katedraalkrans (locality 13), which new evidence indicates was likely to have been ice free during the LGM (see Myburgh *et al.*, 2007; Boelhouwers *et al.*, 2008; McGaughran *et al.*, 2010b; Hall *et al.*, 2011). Whether this was the case for *H. fulvus* is not clear because of our low sample size at this locality. However, it seems likely that in addition to survival in possible higher elevational refugia, this species may also have survived in coastal refugia, which may have been present especially on the western side of the island (Chown, 1990, 1994; Boelhouwers *et al.*, 2008). This is supported by our data where divergent haplotypes were found in several high-altitude and coastal localities (see Fig. 2) which are situated in areas presumed to be ice-free during the LGM (see fig. 4.3 in Boelhouwers *et al.*, 2008). Another reason for assuming survival in both high-elevation and coastal refugia is that the species

occurs in both habitats. Although it is not abundant in high-elevation fellfield habitats or indeed in fellfield more generally, it is common in *Azorella selago* cushions, a plant species that is thought also to have survived in inland refugia (Scott, 1985; Yeloff *et al.*, 2007). *Halozetes fulvus* is also abundant in many lowland habitats including those highly influenced by coastal salt-spray (Barendse *et al.*, 2002). Moreover, it is an endemic of the Prince Edward Islands (Starý & Block, 1998; Marshall & Chown, 2002), and *Halozetes belgicae*, its sister species (see Mortimer *et al.*, 2011), is a typical inhabitant of the supralittoral zone on Marion Island (and elsewhere across its distribution; Mercer, Chown & Marshall, 2000).

Although *H. fulvus* is likely to have expanded rapidly (Marion Island was extensively glaciated during the LGM and so expansion must have occurred in the last few thousand years; rapid expansion is also reflected by the haplotype network as well as haplotype and nucleotide diversity values), this expansion has not been without spatial structure. Rather, populations on the eastern and western sides of the island appear to differ in their degree of relatedness and the extent to which gene flow is currently taking place. Whether the neighbouring Prince Edward Island could act as a source for immigration is moot. However, we consider this highly unlikely for several reasons. First, in all cases where material from both islands has been examined, it is clear that very few haplotypes are shared among these islands (Grobler *et al.*, 2006, 2011b; C. W. Groenewald, S. L. Chown, J. Shaw J & B. Jansen van Vuuren, unpubl. data). An inter-island comparison was also not possible in the current study owing to the infrequency of visits to Prince Edward Island for conservation reasons (see Davies, Chown & Joubert, 2007). Second, the prevailing wind direction for the last 0.5 Myr and probably much longer has been predominantly north-west with north-easterly winds being light and uncommon (see Schulze, 1971; Le Roux, 2008). Third, the species concerned here is a small oribatid that is unlikely to withstand desiccation for any length of time. Indeed, Marshall (1996) showed that 50% mortality occurs after 40 h exposure to desiccating conditions (see also Pugh, 1997). Even if this time (40 h) may be sufficient to allow movement via air currents from Prince Edward to Marion, it should be noted that laboratory experiments of this nature do not take the additional effect of wind (i.e. disruption of boundary layers) into account and survival times are therefore likely to be shorter under natural conditions. Finally, most bird species nesting in the islands are either poor dispersers (e.g. Lesser Sheathbill *Chionis minor*) or are intensely philopatric (albatrosses, petrels) (for a review see Ryan & Bester, 2008) making repeated dispersal events by that route also seem unlikely, or at least sufficiently unlikely to

explain the complex phylogeographical patterns we document.

Rather, this east–west differentiation on Marion Island seems to be closely aligned to the geological division of the island into eastern and western areas along the N26.5°E geological lineament (Fig. 1). Specifically, populations to the east of the discontinuity show considerable differentiation. By contrast, western populations show much less differentiation, and indeed cannot clearly be separated. Why this should be the case is not clear. Certainly it is probably not a consequence of current vegetation patterns because these are not structured in such a way on the island (Gremmen & Smith, 2008) and *H. fulvus* is in any case a habitat generalist (Barendse *et al.*, 2002). However, geological and glacial information suggest that the discontinuity has been associated with other regularities in the history of the island which may help explain these findings. Most significantly, at least three largely grey lava refugia probably existed to the east of the discontinuity during the LGM: Feldmark Plateau, parts of Long Ridge South, and Katedraalkrans. These sites may have served as refugia for populations that differentiated earlier in the island's history, so accounting for the rather confused pattern of both substantial differentiation (with ages much older than the LGM ranging from approximately 34 000 to 134 000 years BP; see Table 2) and widespread distribution of some haplotypes. In this eastern area, the ice sheet during the LGM is likely to have extended at least to, and in some areas beyond, the current coastline (Hall, 2004; Boelhouwers *et al.*, 2008; Hall *et al.*, 2011), so possibly precluding coastal refugia with the possible exception of small areas around Archway Bay and Kildalkey Bay. This would have resulted in colonization of newly exposed habitats from the highland refugia, so resulting in considerable differentiation that is typical also of several other species on the island (Mortimer & Jansen van Vuuren, 2007). By contrast, the LGM ice sheet did not extend to the coast to the west of the discontinuity (Boelhouwers *et al.*, 2008). Moreover, this area of the island has been much more heavily affected by more recent lava flows (including those in the 1980s) (Boelhouwers *et al.*, 2008). This suggests that there has been repeated expansion of populations from coastal sites, with little opportunity for differentiation. In addition, localities where divergent haplotypes were present, in keeping with predictions for refugial populations, correspond well with areas that have been suggested as ice-free (see Fig. 2; see also fig. 4.3 in Boelhouwers *et al.*, 2008).

Although our evidence for the above scenario is largely based on *post-hoc* interpretation of the molecular evidence in the context of the geological history of the island, the two sets of evidence are consistent. Moreover, this approach is in keeping with that



recommended by Emerson *et al.* (2006) in the face of complex geological history. Indeed, it seems likely that our original hypotheses were somewhat simplistic, given that a combination of glaciation, volcanic events, and the division of the island into two major areas have all probably contributed to phylogeographical structuring of *H. fulvus* across Marion Island. However, the current interpretation requires verification from other taxa given that a single species was used here. In doing so, several clearly testable hypotheses should be addressed in future studies, which emerge from consideration of likely habitat preferences among other taxa. For example, the current outcome suggests that the differentiation of populations along the east–west divide should be much less obvious for taxa that are restricted to high-elevation fellfield habitats, such as the weevil *Bothrometopus elongatus* (Chown, 1992) and the mite *Magellozetes antarcticus* (Barendse *et al.*, 2002). By contrast, more eurytopic species such as the weevil *Bothrometopus huntleti* and the springtail *C. antarcticus travei* should show such differentiation after extensive sampling (to some extent, this was shown for *C. antarcticus travei*; see Myburgh *et al.*, 2007; see also McGaughan *et al.*, 2010b for metabolic rate variation). Similarly, purely coastal species, such as the weevil *Palirhoeus eatoni*, and the other mites in the genus *Halozetes* should show a pattern of recolonization of the eastern side of the island from the west. Further work on these species and on *H. fulvus*, using a broader range of markers, will provide a means of testing the hypotheses derived from the current study. Until then, it does seem plausible that congruence exists between the geology of the island and the evolutionary history of populations of the species occupying it. This congruence suggests a pattern of rapid evolutionary change on the island, but for the moment at the within-species level, rather than to the extent that speciation is taking place as has been the case on other islands characterized by complex land forms (Gillespie & Roderick, 2002). To what extent these hypotheses, developed for Marion Island and based on a sound understanding of the habitat preferences of the various organisms, could be extrapolated to other Southern Ocean islands remains unclear. In some cases the geology is well enough known to do so, although information on the distribution and habitat specificity of the terrestrial fauna remains less poorly developed than on Marion Island. Nonetheless, the situation is changing rapidly (e.g. Quilty, 2007; Davies *et al.*, 2011) and similar landscape genetic structuring on these islands seems plausible.

#### ACKNOWLEDGEMENTS

We thank Justine Shaw, Savel Daniels, Peter Convey, Philip Pugh, and two anonymous reviewers for dis-

cussion and useful comments on earlier drafts of the manuscript. This work was supported by NRF SANAP Grant SNA2004070900002 (B.v.V.) and SNA2005061300001 (K.I.M.), and in the field by the logistic services of the South African National Antarctic Programme. We are especially grateful to Jacques Deere, Richard Mercer, and Niek Gremmen for their assistance in the field.

#### REFERENCES

- Allegrucci G, Carchini G, Todisco V, Convey P, Sbordoni V. 2006.** A molecular phylogeny of Antarctic Chironomidae and its implications for biogeographical history. *Polar Biology* **29**: 320–326.
- Ballard JWO, Kreitman M. 1995.** Is mitochondrial DNA a strictly neutral marker. *Trends in Ecology & Evolution* **10**: 485–488.
- Ballard JWO, Whitlock MC. 2004.** The incomplete natural history of mitochondria. *Molecular Ecology* **13**: 729–744.
- Barendse J, Chown SL. 2001.** Abundance and seasonality of mid-altitude fellfield arthropods from Marion Island. *Polar Biology* **24**: 73–82.
- Barendse J, Mercer RD, Marshall DJ, Chown SL. 2002.** Habitat specificity of mites on sub-Antarctic Marion Island. *Environmental Entomology* **31**: 612–625.
- Bergstrom DM, Chown SL. 1999.** Life at the front: history, ecology and change on southern ocean islands. *Trends in Ecology & Evolution* **14**: 472–477.
- Boelhouwers JC, Meiklejohn KI, Holness SD, Hedding DW. 2008.** Geology, geomorphology and change. In: Chown SL, Froneman PW, eds. *The Prince Edward Islands: land–sea interactions in a changing ecosystem*. Stellenbosch: Sun Press, 65–96.
- Brose U, Martinez ND. 2004.** Estimating the richness of species with variable mobility. *Oikos* **105**: 292–300.
- Brose U, Martinez ND, Williams RJ. 2003.** Estimating species richness: sensitivity to sample coverage and insensitivity to spatial patterns. *Ecology* **84**: 2364–2377.
- Chao A, Chazdon RL, Colwell RK, Shen TJ. 2005.** A new statistical approach for assessing similarity of species composition with incidence and abundance data. *Ecology Letters* **8**: 148–159.
- Chevallier L. 1986.** Tectonics of Marion and Prince Edward volcanoes (Indian Ocean): result of regional control and edifice dynamics. *Tectonophysics* **124**: 155–175.
- Chown SL. 1990.** Possible effects of Quaternary climatic-change on the composition of insect communities of the South Indian–Ocean Province Islands. *South African Journal of Science* **86**: 386–391.
- Chown SL. 1992.** A preliminary-analysis of weevil assemblages in the sub-Antarctic – local and regional patterns. *Journal of Biogeography* **19**: 87–98.
- Chown SL. 1994.** Historical ecology of sub-Antarctic weevils (Coleoptera, Curculionidae) – patterns and processes on isolated islands. *Journal of Natural History* **28**: 411–433.
- Chown SL, Convey P. 2007.** Spatial and temporal variability across life's hierarchies in the terrestrial Antarctic.

- Philosophical Transactions of the Royal Society of London B* **362**: 2307–2331.
- Clement M, Posada D, Crandall KA. 2000.** TCS: a computer program to estimate gene genealogies. *Molecular Ecology* **9**: 1657–1659.
- Colwell RK. 2005.** *EstimateS: statistical estimation of species richness and shared species from samples*. User's Guide and application: <http://purl.oclc.org/estimates>
- Convey P, Stevens MI. 2007.** Antarctic biodiversity. *Science* **317**: 1877–1878.
- Coulson SJ, Hodkinson ID, Webb NR, Harrison JA. 2002.** Survival of terrestrial soil-dwelling arthropods on and in seawater: implications for trans-oceanic dispersal. *Functional Ecology* **16**: 353–356.
- Crandall KA, Templeton AR. 1993.** Empirical tests of some predictions from coalescent theory with applications to intraspecific phylogeny reconstruction. *Genetics* **134**: 959–969.
- Davies KF, Melbourne BA, McClenahan J, Tuff T. 2011.** Statistical models for monitoring and predicting effects of climate change and invasion on the free-living insects and a spider from sub-Antarctic Heard Island. *Polar Biology* **34**: 119–125.
- Davies SJ, Chown SL, Joubert LS. 2007.** Renewed management system and provisions for South Africa's sub-Antarctic Islands. In: Selkirk PM, Quilty PG, Davies M, eds. *The Sub-Antarctic: proceedings of a forum held at CCAMLR on behalf of Antarctic Tasmania*. Hobart: Printing Authority of Tasmania, 115–120.
- De Queiroz A. 2005.** The resurrection of oceanic dispersal in historical biogeography. *Trends in Ecology and Evolution* **20**: 68–73.
- Emerson BC, Forgie S, Goodacre S, Oromi P. 2006.** Testing phylogeographic predictions on an active volcanic island: *Brachyderes rugatus* (Coleoptera: Curculionidae) on La Palma (Canary Islands). *Molecular Ecology* **15**: 449–458.
- Emerson BC, Oromi P, Hewitt GM. 2000.** Tracking colonization and diversification of insect lineages on islands: mitochondrial DNA phylogeography of *Tarphius canariensis* (Coleoptera: Colydiidae) on the Canary Islands. *Proceedings of the Royal Society of London B* **267**: 2199–2205.
- Excoffier L, Laval G, Schneider S. 2005.** Arlequin ver 3.0: an integrated software package for population genetics data analysis. *Evolutionary Bioinformatics Online* **1**: 47–50.
- Fanciulli PP, Summa D, Dallai R, Frati F. 2001.** High levels of genetic variability and population differentiation in *Gressittacantha terranova* (Collembola, Hexapoda) from Victoria Land, Antarctica. *Antarctic Science* **13**: 246–254.
- Folmer O, Black M, Hoeh W, Lutz R, Vrijenhoek R. 1994.** DNA primers for amplification of mitochondrial cytochrome c oxidase subunit I from diverse metazoan invertebrates. *Molecular Marine Biology and Biotechnology* **3**: 294–299.
- Frati F, Spinsanti G, Dallai R. 2001.** Genetic variation of mt COII gene sequences in the collembolan *Isotoma klovs-tadi* from Victoria Land, Antarctica: evidence for population differentiation. *Polar Biology* **24**: 934–940.
- Gillespie RG. 2004.** Community assembly through adaptive radiation in Hawaiian spiders. *Science* **303**: 356–359.
- Gillespie RG, Roderick GK. 2002.** Arthropods on islands: colonization, speciation, and conservation. *Annual Review of Entomology* **47**: 595–632.
- Gotelli JN, Colwell RK. 2001.** Quantifying biodiversity: procedures and pitfalls in the measurement and comparison of species richness. *Ecology Letters* **4**: 379–391.
- Gremmen NJM, Smith VR. 2008.** Terrestrial vegetation and dynamics. In: Chown SL, Froneman PW, eds. *The Prince Edward Islands: land-sea interactions in a changing ecosystem*. Stellenbosch: Sun Press, 215–244.
- Grobler GC, Bastos ADS, Treasure AM, Chown SL. 2011a.** Cryptic species, biogeographic complexity and the evolutionary history of the Ectemnorhinus group in the sub-Antarctic, including a description of *Bothrometopus huntleyi*, n. sp. *Antarctic Science* **23**: 211–224.
- Grobler GC, Bastos ADS, Chimimba CT, Chown SL. 2011b.** Inter-island dispersal of flightless *Bothrometopus huntleyi* (Coleoptera: Curculionidae) from the sub-Antarctic Prince Edward Island archipelago. *Antarctic Science* **23**: 225–234.
- Grobler GC, Janse Van Rensburg L, Bastos ADS, Chimimba CT, Chown SL. 2006.** Molecular and morphometric assessment of the taxonomic status of *Ectemnorhinus* weevil species (Coleoptera: Curculionidae, Entiminae) from the sub-Antarctic Prince Edward Islands. *Journal of Zoological Systematics and Evolutionary Research* **44**: 200–211.
- Hall K, Meiklejohn I, Bumby A. 2011.** Marion Island volcanism and glaciation. *Antarctic Science* **23**: 155–163.
- Hall KJ. 1982.** Rapid deglaciation as an initiator of volcanic activity: an hypothesis. *Earth Surface Processes and Landforms* **7**: 45–51.
- Hall KJ. 2002.** Review of present and Quaternary periglacial processes and landforms of the maritime and sub-Antarctic region. *South African Journal of Science* **98**: 71–81.
- Hall KJ. 2004.** Quaternary glaciation of the sub-Antarctic islands. In: Ehlers J, Gibbard PI, eds. *Quaternary glaciations – extent and chronology, Part III*. Amsterdam: Elsevier, 339–345.
- Hasegawa M, Kishino H, Yano T. 1985.** Dating the human–ape splitting by a molecular clock of mitochondrial DNA. *Journal of Molecular Evolution* **22**: 160–174.
- Hawes TC, Worland MR, Bale JS, Convey P. 2008.** Rafting in Antarctic Collembola. *Journal of Zoology* **274**: 44–50.
- Hey J, Nielsen R. 2004.** Multilocus methods for estimating population sizes, migration rates and divergence time, with applications to the divergence of *Drosophila pseudoobscura* and *D. persimilis*. *Genetics* **167**: 747–760.
- Joly S, Stevens MI, Jansen van Vuuren B. 2007.** Haplotype networks can be misleading in the presence of missing data. *Systematic Biology* **56**: 857–862.
- Jordan S, Simon C, Foote D, Englund RA. 2005.** Phylogeographic patterns of Hawaiian *Megalagrion* damselflies (Odonata: Coenagrionidae) correlate with Pleistocene island boundaries. *Molecular Ecology* **14**: 3457–3470.
- Kable EJD, Erlank AJ, Cherry RD. 1971.** Geochemical features of lavas. In: Van Zinderen Bakker EM,

- Winterbottom JM, Dyer RA, eds. *Marion and Prince Edward Islands: report on the South African biological and geological expedition 1965–1966*. Cape Town: AA Balkema, 78–88.
- Kuhner MK. 2006.** LAMARC 2.0: maximum likelihood and Bayesian estimation of population parameters. *Bioinformatics (Oxford, England)* **22**: 768–770.
- Le Roux PC. 2008.** Climate and climate change. In: Chown SL, Froneman PW, eds. *The Prince Edward Islands: land-sea interactions in a changing ecosystem*. Stellenbosch: Sun Press, 39–64.
- Lee JE, Janion C, Marais E, Jansen van Vuuren B, Chown SL. 2009.** Physiological tolerances account for range limits and abundance structure in an invasive slug. *Proceedings of the Royal Society of London B* **276**: 1459–1468.
- Lee JE, Slabber S, Jansen van Vuuren B, Van Noort S, Chown SL. 2007.** Colonisation of sub-Antarctic Marion Island by a non-indigenous aphid parasitoid *Aphidius matrixariae* (Hymenoptera, Braconidae). *Polar Biology* **30**: 1195–1201.
- Librado P, Rozas J. 2009.** DnaSP v5: a software for comprehensive analysis of DNA polymorphism data. *Bioinformatics (Oxford, England)* **25**: 1451–1452.
- Lowe A, Harris S, Ashton P. 2004.** *Ecological genetics: design, analysis, and application*. Oxford: Blackwell Publishing.
- Magurran AE. 2004.** *Measuring biological diversity*. Oxford: Blackwell Publishing.
- Marshall DJ. 1996.** Comparative water relations of sub-Antarctic and continental Antarctic oribatid mites. *Polar Biology* **16**: 287–292.
- Marshall DJ, Chown SL. 2002.** The Acarine fauna of Heard Island. *Polar Biology* **25**: 688–695.
- McDougall I, Verwoerd W, Chevallier L. 2001.** K–Ar geochronology of Marion Island, Southern Ocean. *Geological Magazine* **138**: 1–17.
- McGaughran A, Torricelli G, Carapelli A, Frati F, Stevens MI, Convey P, Hogg ID. 2010a.** Contrasting phylogeographical patterns for springtails reflect different evolutionary histories between the Antarctic Peninsula and continental Antarctica. *Journal of Biogeography* **37**: 103–119.
- McGaughran A, Convey P, Stevens MI, Chown SL. 2010b.** Metabolic rate, genetic and microclimate variation among springtail populations from sub-Antarctic Marion Island. *Polar Biology* **33**: 909–918.
- Meiklejohn KI, Smith VR. 2008.** Surface areas of altitudinal zones on sub-Antarctic Marion Island. *Polar Biology* **31**: 259–261.
- Mercer RD, Chown SL, Marshall DJ. 2000.** Mite and insect zonation on a Marion Island rocky shore: a quantitative approach. *Polar Biology* **23**: 775–784.
- Mortimer E, Jansen van Vuuren B. 2007.** Phylogeography of *Eupodes minutus* (Acari: Prostigmata) on sub-Antarctic Marion Island reflects the impact of historical events. *Polar Biology* **30**: 471–476.
- Mortimer E, Jansen van Vuuren B, Lee JE, Marshall DJ, Convey P, Chown SL. 2011.** Mite dispersal among the Southern Ocean Islands and Antarctica before the last glacial maximum. *Proceedings of the Royal Society B: Biological Sciences* **278**: 1247–1255.
- Mortimer E, McGeoch MA, Daniels SR, Jansen van Vuuren B. 2008.** Growth form and population genetic structure of *Azorella selago* on sub-Antarctic Marion Island. *Antarctic Science* **20**: 381–390.
- Myburgh M, Chown SL, Daniels SR, Jansen van Vuuren B. 2007.** Population structure, propagule pressure, and conservation biogeography in the sub-Antarctic: lessons from indigenous and invasive springtails. *Diversity and Distributions* **13**: 143–154.
- Nielsen R. 2002.** *MDIV software*. Available at [http://www.biom.cornell.edu/Homepages/Rasmus\\_Nielsen/files.html](http://www.biom.cornell.edu/Homepages/Rasmus_Nielsen/files.html)
- Nielsen R, Wakeley J. 2001.** Distinguishing migration from isolation: a Markov Chain Monte Carlo approach. *Genetics* **158**: 885–896.
- Nolan L, Hogg ID, Stevens MI, Haase M. 2006.** Fine scale distribution of mtDNA haplotypes for the springtail *Gomphiocephalus hodgsoni* (Collembola) corresponds to an ancient shoreline in Taylor Valley, continental Antarctica. *Polar Biology* **29**: 813–819.
- Nyakatya MJ, McGeoch MA. 2008.** Temperature variation across Marion Island associated with a keystone plant species [*Azorella selago* Hook. (Apiaceae)]. *Polar Biology* **31**: 139–151.
- O'Hara RB. 2005.** Species richness estimators: how many species can dance on the head of a pin? *Journal of Animal Ecology* **74**: 375–386.
- Panchal M, Beaumont MA. 2007.** The automation and evaluation of nested clade phylogeographic analysis. *Evolution* **61**: 1466–1480.
- Paulay G. 1985.** Adaptive radiation on an isolated oceanic island: the Cryptorhynchinae (Curculionidae) of Rapa revisited. *Biological Journal of the Linnean Society* **26**: 95–187.
- Petit RJ. 2008.** On the falsifiability of the nested clade phylogeographic analysis method. *Molecular Ecology* **17**: 1404–1404.
- Pfenninger M, Posada D. 2002.** Phylogeographic history of the land snail *Candidula unifasciata* (Helicellinae, Stylomatophora): fragmentation, corridor migration, and secondary contact. *Evolution* **56**: 1776–1788.
- Posada D. 2004.** *Collapse*. Boston, MA: Free Software Foundation Inc.
- Posada D, Crandall KA, Templeton AR. 2000.** GeoDis: a program for the cladistic nested analysis of the geographical distribution of genetic haplotypes. *Molecular Ecology* **9**: 487–488.
- Pugh PJA. 1997.** Acarine colonisation of Antarctica and the islands of the Southern Ocean: the role of zoohoria. *Polar Record* **33**: 113–122.
- Quilty PG. 2007.** Origin and evolution of the sub-Antarctic islands: the foundation. *Papers and Proceedings of the Royal Society of Tasmania* **141**: 35–58.
- Rogers AD. 2007.** Evolution and biodiversity of Antarctic organisms: a molecular perspective. *Philosophical Transactions of the Royal Society of London B* **362**: 2191–2214.



- Ryan PG, Bester MN. 2008.** Pelagic predators. In: Chown SL, Froneman PW, eds. *The Prince Edward Islands: land-sea interactions in a changing ecosystem*. Stellenbosch: Sun Press, 121–164.
- Salomone N, Emerson BC, Hewitt GM, Bernini F. 2002.** Phylogenetic relationships among the Canary Island Steganacaridae (Acari, Oribatida) inferred from mitochondrial DNA sequence data. *Molecular Ecology* **11**: 79–89.
- Sanmartín I, Ronquist F. 2004.** Southern hemisphere biogeography inferred by event-based models: plant versus animal patterns. *Systematic Biology* **53**: 216–243.
- Sanmartín I, Wanntorp L, Winkworth RC. 2007.** West wind drift revisited: testing for directional dispersal in the Southern Hemisphere using event-based tree fitting. *Journal of Biogeography* **34**: 398–416.
- Schulze BR. 1971.** The climate of Marion Island. In: van Zinderen Bakker EM, Winterbottom JM, Dyer RA, eds. *Marion and Prince Edward Islands. Report on the South African biological and geological expeditions 1965–1966*. Cape Town: AA Balkema, 16–31.
- Scott L. 1985.** Palynological indications of the Quaternary vegetation history of Marion Island (sub-Antarctic). *Journal of Biogeography* **12**: 413–431.
- Skotnicki ML, Ninham JA, Selkirk PM. 2000.** Genetic diversity, mutagenesis and dispersal of Antarctic mosses – a review of progress with molecular studies. *Antarctic Science* **12**: 363–373.
- Skotnicki ML, Selkirk PM, Broady P, Adam KD, Ninham JA. 2001.** Dispersal of the moss *Campylopus pyriformis* on geothermal ground near the summits of Mount Erebus and Mount Melbourne, Victoria Land, Antarctica. *Antarctic Science* **13**: 280–285.
- Starý J, Block W. 1998.** Distribution and biogeography of oribatid mites (Acari: Oribatida) in Antarctica, the sub-Antarctic islands and nearby land areas. *Journal of Natural History* **32**: 861–894.
- Stevens MI, Greenslade P, Hogg ID, Sunnucks P. 2006.** Southern hemisphere springtails: could any have survived glaciation of Antarctica? *Molecular Biology and Evolution* **23**: 874–882.
- Stevens MI, Hogg ID. 2003.** Long-term isolation and recent range expansion from glacial refugia revealed for the endemic springtail *Gomphiocephalus hodgsoni* from Victoria Land, Antarctica. *Molecular Ecology* **12**: 2357–2369.
- Storfer A, Murphy MA, Spear SF, Holderegger R, Waits LP. 2010.** Landscape genetics: where are we now? *Molecular Ecology* **19**: 3496–3514.
- Templeton AR. 2008.** Nested clade analyses: an extensively validated method for strong phylogenetic inference. *Molecular Ecology* **17**: 1877–1880.
- Templeton AR, Boerwinkle E, Sing CF. 1987.** A cladistic analysis of phenotypic associations with haplotypes inferred from restriction endonuclease mapping. I. Basic theory and an analysis of alcohol dehydrogenase activity in *Drosophila*. *Genetics* **117**: 343–351.
- Ulrich W, Ollik M. 2005.** Limits to the estimation of species richness: the use of relative abundance distributions. *Diversity and Distributions* **11**: 265–273.
- Verwoerd WJ. 1971.** Marion and Prince Edward Islands. In: Van Zinderen Bakker EM, Winterbottom JM, Dyer RA, eds. *Report on the South African biological and geological expedition 1965–1966*. Cape Town: AA Balkema Press, 40–53.
- Wagner WL, Funk VA. 1995.** *Hawaiian biogeography. Evolution on a hot spot archipelago*. Washington, DC: Smithsonian Institution Press.
- Walther BA, Moore JL. 2005.** The concepts of bias, precision and accuracy, and their use in testing the performance of species richness estimators, with a literature review of estimator performance. *Ecography* **28**: 815–829.
- Yeloff D, Mauquoy D, Barber K, Way S, Van Geel B, Turney CSM. 2007.** Volcanic ash deposition and long-term vegetation change on subantarctic Marion Island. *Arctic, Antarctic and Alpine Research* **39**: 500–511.

## SUPPORTING INFORMATION

Additional Supporting Information may be found in the online version of this article:

**Table S1.** Haplotype distribution across sampling localities. The colour of the haplotypes (red, green, blue) corresponds to the main haplogroups in Figure 4, and population numbers correspond to numbers given in Table 1.

**Table S2.** Pairwise  $F_{ST}$  values for all sampling localities included in the study are presented below the diagonal. # indicates significance at  $P < 0.05$ . Uncorrected sequence divergence values separating sampling localities are presented above the diagonal.

Please note: Wiley-Blackwell are not responsible for the content or functionality of any supporting materials supplied by the authors. Any queries (other than missing material) should be directed to the corresponding author for the article.
